# Supplementary material for: Land cover effects on hydrologic services under a precipitation gradient
Source: Copernicus journal article supplement (doi:10.5194/hess-22-5227-2018), 2018-10-12
Supplement: Supplementary file 1 [file hess-22-5227-2018-supplement.pdf]

Supplement of Hydrol. Earth Syst. Sci., 22, 5227–5241, 2018  
<https://doi.org/10.5194/hess-22-5227-2018-supplement>  
© Author(s) 2018. This work is distributed under  
the Creative Commons Attribution 4.0 License.

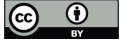

*Supplement of*

## **Land cover effects on hydrologic services under a precipitation gradient**

**Ane Zabaleta et al.**

*Correspondence to:* Ane Zabaleta (ane.zabaleta@ehu.eus)

The copyright of individual parts of the supplement might differ from the CC BY 4.0 License.

## Supplementary material

**Figure S1:** Hydrographs for the 20 catchments in Table 1 for the hydrological year 2000–2001. The meaning of some of the calculated hydrological indicators is also indicated in the figure.

**Figure S2:** Boxplots representing the statistics of a) annual and b) seasonal precipitation for the 20 studied catchments during the hydrological years considered. A = Autumn, W = Winter, Sp = Spring and Sm = Summer.

**Figure S3:** Linear regressions obtained between a) annual precipitation (YP, mm) and runoff (YR, mm) b) precipitation from spring and winter (SpP + WP) and average discharge in spring (Sp50m) c) precipitation from winter and autumn (WP + AP) and wintertime high flows (W90m) and d) precipitation from spring and winter (SpP + WP) and low flows in spring (Sp10m).

**Figure S1**

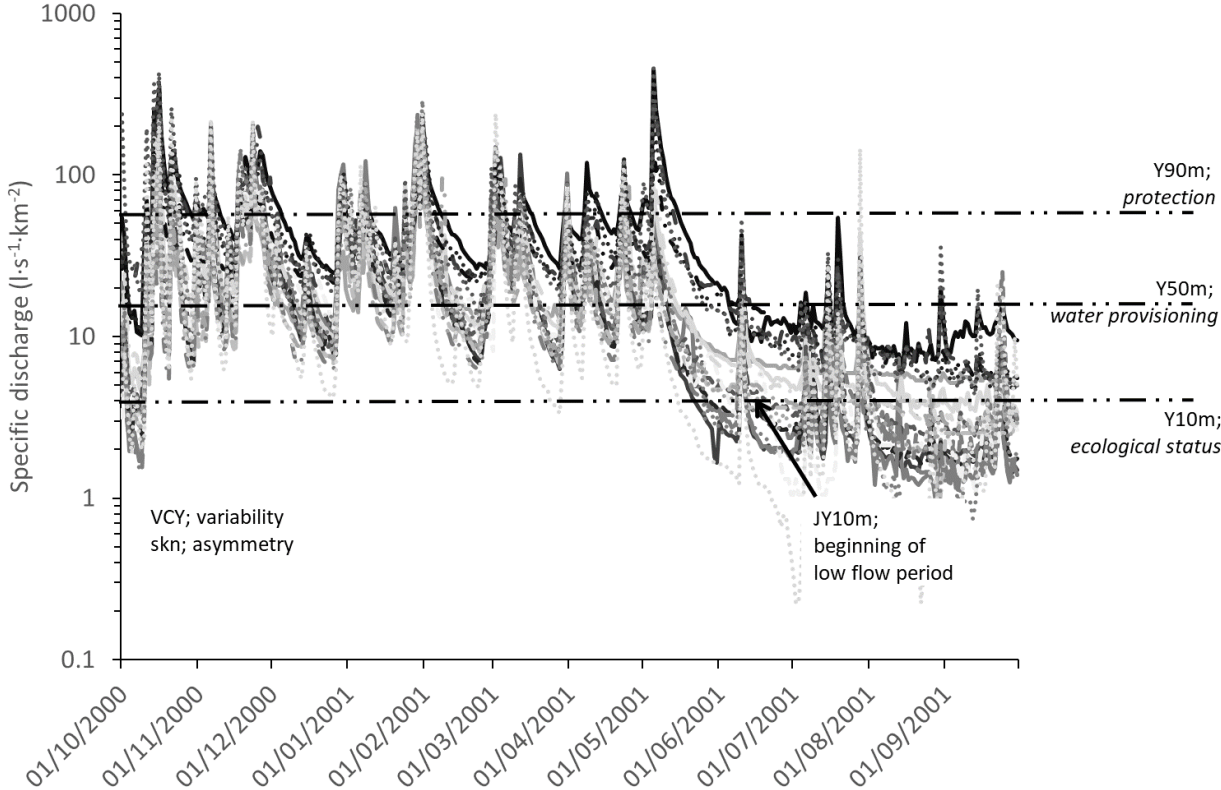

**Figure S1:** Hydrographs for the 20 catchments in Table 1 for the hydrological year 2000–2001. The meaning of some of the calculated hydrological indicators is also indicated in the figure.

Figure S2

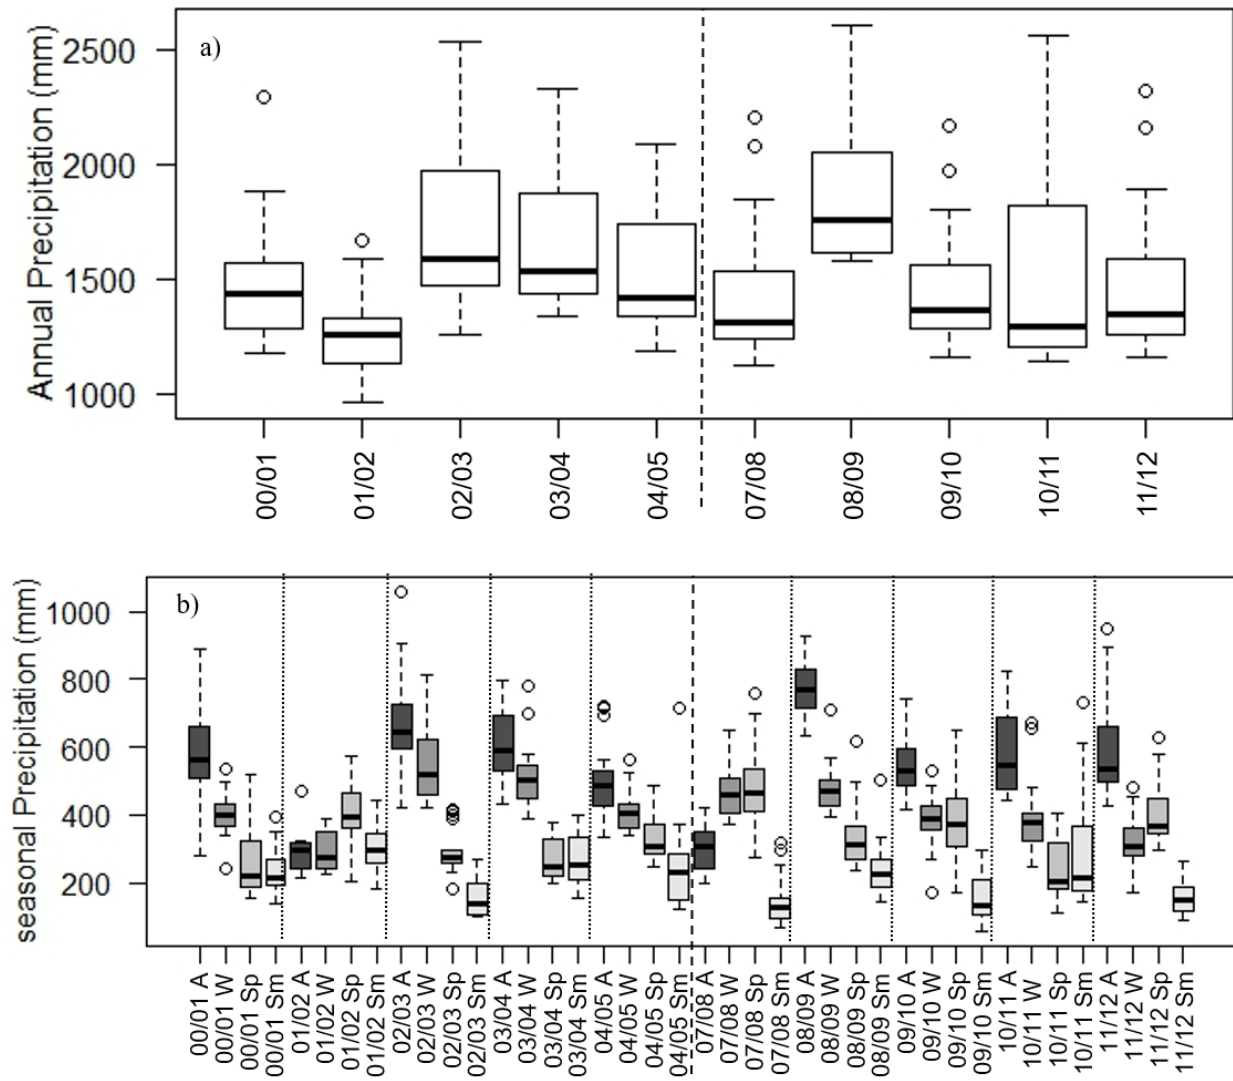

Figure S2: Boxplots representing the statistics of a) annual and b) seasonal precipitation for the 20 studied catchments during the hydrological years considered. A = Autumn, W = Winter, Sp = Spring and Sm = Summer.

**Figure S3**

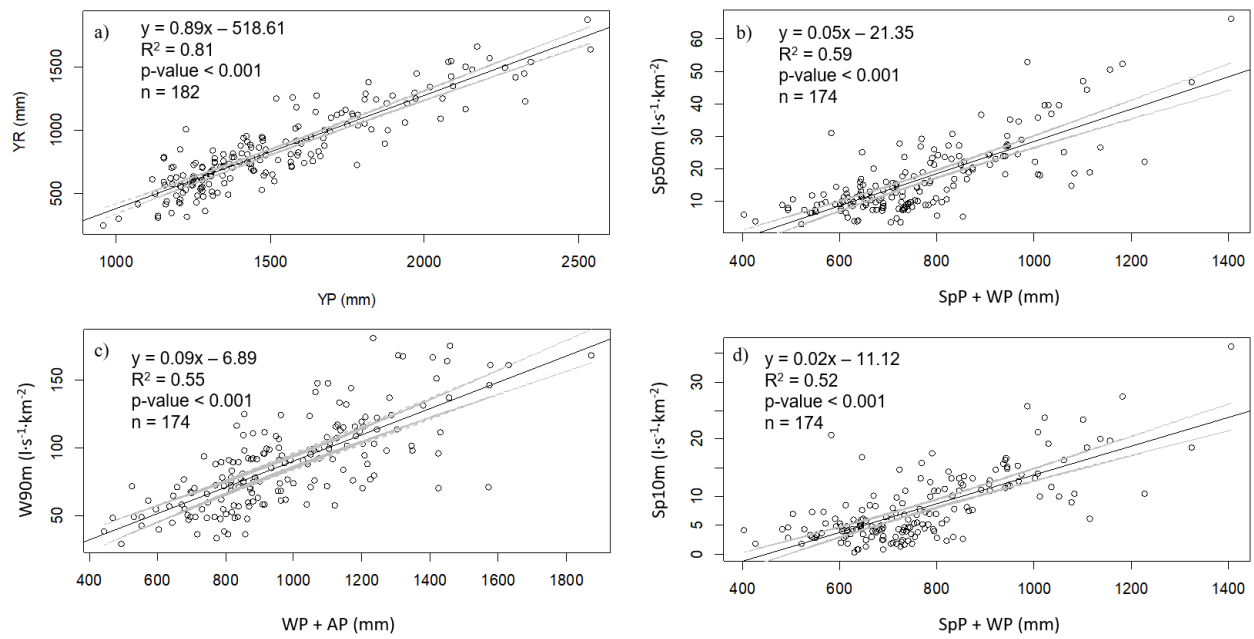

**Figure S3:** Linear regressions obtained between a) annual precipitation (YP, mm) and runoff (YR, mm) b) precipitation from spring and winter (SpP + WP) and average discharge in spring (Sp50m) c) precipitation from winter and autumn (WP + AP) and wintertime high flows (W90m) and d) precipitation from spring and winter (SpP + WP) and low flows in spring (Sp10m).

**Table S1: Multiple regression models.**

a) Multiple regression model for annual average flows (Y50m) considering alternative land cover and its interaction with annual precipitation (YP).

|                      | Estimate | Std. Error | t value | p value | Significance |
|----------------------|----------|------------|---------|---------|--------------|
| (Intercept)          | 50.67649 | 21.3388    | 2.3749  | 0.01862 | *            |
| YP                   | -0.02049 | 0.0150     | -1.3635 | 0.17446 |              |
| Native               | -0.80268 | 0.2677     | -2.9985 | 0.00310 | **           |
| Exotic               | -0.56718 | 0.2329     | -2.4354 | 0.01586 | *            |
| Pasturelands         | -0.81356 | 0.2181     | -3.7296 | 0.00026 | ***          |
| I(Native * YP)       | 0.00046  | 0.0002     | 2.6403  | 0.00902 | **           |
| I(Exotic *YP)        | 0.00030  | 0.0002     | 1.8558  | 0.06513 | .            |
| I(Pasturelands * YP) | 0.00057  | 0.0002     | 3.4285  | 0.00075 | ***          |

Significance codes: 0 '\*\*\*' 0.001 '\*\*' 0.01 '\*' 0.05 '.' 0.1 ' ' 1

Residual standard error: 3.96 on 178 degrees of freedom

Multiple R-squared: 0.7791, Adjusted R-squared: 0.7704

F-statistic: 89.69 on 7 and 178 DF, p-value: < 2.2e-16

b) Multiple regression model for average discharge for spring (Sp50m) considering alternative land cover and its interaction with seasonal precipitation (spring + winter precipitation, SpPt).

|                        | Estimate | Std. Error | t value | p value | Significance |
|------------------------|----------|------------|---------|---------|--------------|
| (Intercept)            | 84.01452 | 43.1914    | 1.9452  | 0.05345 | .            |
| SpPt (SpP+WP)          | -0.06791 | 0.0586     | -1.1585 | 0.24833 |              |
| Native                 | -1.44268 | 0.5367     | -2.6879 | 0.00792 | **           |
| Exotic                 | -0.86076 | 0.5230     | -1.6457 | 0.10172 |              |
| Pasturelands           | -0.98659 | 0.3952     | -2.4965 | 0.01352 | *            |
| I(Native * SpPt)       | 0.00159  | 0.0007     | 2.3249  | 0.02129 | *            |
| I(Exotic *SpPt)        | 0.00083  | 0.0007     | 1.1590  | 0.24811 |              |
| I(Pasturelands * SpPt) | 0.00127  | 0.0006     | 2.2893  | 0.02332 | *            |

Significance codes: 0 '\*\*\*' 0.001 '\*\*' 0.01 '\*' 0.05 '.' 0.1 ' ' 1

Residual standard error: 6.784 on 166 degrees of freedom

Multiple R-squared: 0.6407, Adjusted R-squared: 0.6256

F-statistic: 42.29 on 7 and 166 DF, p-value: < 2.2e-16

c) Multiple regression model for annual high flows (Y90m) considering alternative land cover and its interaction with annual precipitation (YP).

|             | Estimate  | Std. Error | t value | p value  | Significance |
|-------------|-----------|------------|---------|----------|--------------|
| (Intercept) | -2.86E+02 | 1.06E+02   | -2.707  | 0.007451 | **           |
| YP          | 2.46E-01  | 7.31E-02   | 3.364   | 0.000941 | ***          |

|                      |           |          |         |          |    |
|----------------------|-----------|----------|---------|----------|----|
| Native               | 2.88E+00  | 1.14E+00 | 2.5281  | 0.01234  | *  |
| Exotic               | 2.02E+00  | 1.14E+00 | 1.766   | 0.079105 | .  |
| Pasturelands         | 3.44E+00  | 1.19E+00 | 2.8874  | 0.004367 | ** |
| I(Native * YP)       | -2.07E-03 | 7.54E-04 | -2.7403 | 0.006764 | ** |
| I(Exotic *YP)        | -1.54E-03 | 7.85E-04 | -1.9637 | 0.051117 | .  |
| I(Pasturelands * YP) | -2.45E-03 | 8.50E-04 | -2.8772 | 0.004503 | ** |

Significance codes: 0 '\*\*\*\*' 0.001 '\*\*' 0.01 '\*' 0.05 '.' 0.1 ' ' 1

Residual standard error: 13.5 on 178 degrees of freedom

Multiple R-squared: 0.6837, Adjusted R-squared: 0.6713

F-statistic: 54.97 on 7 and 178 DF, p-value: < 2.2e-16

d) Multiple regression model for low flows for spring (Sp10m) considering alternative land cover and its interaction with seasonal precipitation (spring + winter precipitation, SpPt).

|                        | Estimate | Std. Error | t value | p value | Significance |
|------------------------|----------|------------|---------|---------|--------------|
| (Intercept)            | 65.57420 | 33.1084    | 1.9806  | 0.04929 | *            |
| SpPt (SpP+WP)          | -0.06361 | 0.0458     | -1.3876 | 0.16712 |              |
| Native                 | -0.99263 | 0.3915     | -2.5358 | 0.01214 | *            |
| Exotic                 | -0.65681 | 0.3678     | -1.7858 | 0.07596 | .            |
| Pasturelands           | -0.80725 | 0.3327     | -2.4266 | 0.01631 | *            |
| I(Native * SpPt)       | 0.00109  | 0.0005     | 2.1315  | 0.03452 | *            |
| I(Exotic *SpPt)        | 0.00070  | 0.0005     | 1.3761  | 0.17065 |              |
| I(Pasturelands * SpPt) | 0.00108  | 0.0005     | 2.2733  | 0.02429 | *            |

Significance codes: 0 '\*\*\*\*' 0.001 '\*\*' 0.01 '\*' 0.05 '.' 0.1 ' ' 1

Residual standard error: 3.955 on 166 degrees of freedom

Multiple R-squared: 0.5759, Adjusted R-squared: 0.558

F-statistic: 32.2 on 7 and 166 DF, p-value: < 2.2e-16
